# Supplementary material for: Dye-doped cellulose nanocrystals as novel dusting powders for visualizing latent fingerprints
Source: Royal Society of Chemistry journal article supplement (doi:10.1039/d4ay00923a), 2024-01-01
Supplement: d4ay00923a1.pdf [file d4ay00923a1.pdf]

# Dye-Doped Cellulose Nanocrystals as Novel Dusting Powders for Visualizing Latent Fingerprints

Xu Yao<sup>1,#</sup>, Guo-Rui Li<sup>1,#</sup>, Jiu-Jiang Wang<sup>2,3,#</sup>, Cheng Tang<sup>1</sup>, Da-Wu Li<sup>2,3,\*</sup>, Nan  
You<sup>1,\*</sup>, Wei Mao<sup>1,\*</sup>, Zhan-Chao Li<sup>4,\*</sup>, Si-Qi Zhang<sup>5</sup>

(1. College of Petrochemical Engineering, Liaoning Petrochemical University, Fushun, 113001; 2. College of Forensic Science, Criminal Investigation Police University of China, Shenyang, Liaoning, 110035, China; 3. Key Laboratory of Impression Evidence Examination and Identification Technology, Ministry of Public Security, Shenyang, Liaoning, 110035, China; 4. Shenyang polytechnic college, Shenyang, 1100451; 5. School of Pharmaceutical and Chemical Engineering, Taizhou University, Jiaojiang, Zhejiang, 318000, China)

# The first three authors contributed equally to this paper

**Email:** ldw20001980@163.com (D-W Li), mao\_maowei @163.com (W Mao), younan\_77@163.com (N You), and sylzc2023@163.com (Z-C Li)

### Calculation of adsorption capacity

$$q = (C_0 - C_t) V/m \quad (\text{S1})$$

where  $q$  ( $\text{mg g}^{-1}$ ) is the adsorption amounts,  $C_0$  ( $\text{mg L}^{-1}$ ) is the initial concentration of dyes,  $C_t$  ( $\text{mg L}^{-1}$ ) is the remnant concentration of dyes,  $V$  ( $\text{mL}$ ) is the volume of solution and  $m$  ( $\text{g}$ ) is the mass of the cellulose nanocrystals.

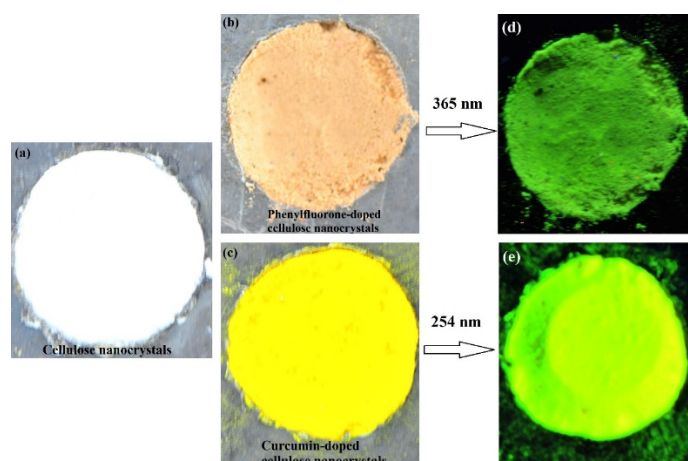

**Figure S1** Appearance of (a) cellulose nanocrystals, (b) phenylfluorone-doped cellulose nanocrystals and (c) curcumin-doped cellulose nanocrystals in daylight, (d) phenylfluorone-doped cellulose nanocrystals irradiation with 365 nm UV-light, and (e) curcumin-doped cellulose nanocrystals irradiation with 254 nm UV-light.

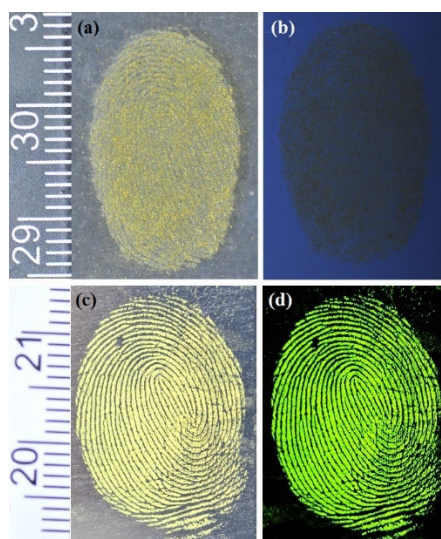

**Figure S2** Comparative imaging of the LFPs by the pure curcumin (a and b) with the CDCN (c and d) under daylight and 254 nm UV-light.
